# Supplementary material for: Contributions of Pavlovian incentive motivation to cue-potentiated feeding
Source: PubMed Central journal article supplement (PMC5807356; doi:10.1038/s41598-018-21046-0), 2018-02-09
Supplement: 41598_2018_21046_MOESM1_ESM.pdf [file 41598_2018_21046_MOESM1_ESM.pdf]

## Contributions of Pavlovian incentive motivation to cue-potentiated feeding

Andrew T. Marshall, Briac Halbout, Angela T. Liu, and Sean B. Ostlund

**Table S1. Generalized linear mixed-effects model output for the analysis of cue-potentiated feeding in Experiment 1.**

|                                     | <i>t</i> (116) | <i>P</i> | <i>b</i> | 95% CI          |
|-------------------------------------|----------------|----------|----------|-----------------|
| Intercept                           | 23.70          | < .001   | 5.30     | [4.85, 5.74]    |
| Concentration                       | 1.39           | .168     | 0.26     | [-0.11, 0.64]   |
| CS Period                           | 3.06           | .003     | 0.15     | [0.05, 0.24]    |
| CS Type                             | -0.38          | .706     | -0.03    | [-0.19, 0.13]   |
| Concentration * CS Period           | -2.19          | .031     | -0.01    | [-0.02, -0.001] |
| Concentration * CS Type             | -21.90         | < .001   | -0.13    | [-0.15, -0.12]  |
| CS Period * CS Type                 | 12.70          | < .001   | 0.07     | [0.06, 0.08]    |
| Concentration * CS Period * CS Type | -7.18          | < .001   | -0.04    | [-0.05, -0.03]  |

Note: Categorical variables were effect coded with 2%/20% (Concentration) as -1/+1, Pre-CS/CS (CS Period) as -1/+1, and Unpaired/Paired (CS Type) as -1/+1. Analysis included 124 data points. CS = conditioned stimulus.

**Table S2. Generalized linear mixed-effects model output for the analysis of cue-potentiated feeding in Experiment 2.**

|                                     | <i>t</i> (120) | <i>P</i> | <i>b</i> | 95% CI        |
|-------------------------------------|----------------|----------|----------|---------------|
| Intercept                           | 23.54          | < .001   | 4.98     | [4.56, 5.39]  |
| Concentration                       | -1.14          | .255     | -0.22    | [-0.61, 0.16] |
| CS Period                           | 2.66           | .009     | 0.27     | [0.07, 0.46]  |
| CS Type                             | -0.77          | .440     | -0.06    | [-0.22, 0.10] |
| Concentration * CS Period           | 9.13           | < .001   | 0.06     | [0.05, 0.08]  |
| Concentration * CS Type             | 9.84           | < .001   | 0.07     | [0.05, 0.08]  |
| CS Period * CS Type                 | 15.16          | < .001   | 0.10     | [0.09, 0.11]  |
| Concentration * CS Period * CS Type | -1.00          | .319     | -0.01    | [-0.02, 0.01] |

Note: Categorical variables were effect coded with 2%/20% (Concentration) as -1/+1, Pre-CS/CS (CS Period) as -1/+1, and Unpaired/Paired (CS Type) as -1/+1. Analysis included 128 data points. CS = conditioned stimulus.

**Table S3. Generalized linear mixed-effects model output for the analysis of cue-potentiated feeding in Experiment 3.**

|                            | <i>t</i> (120) | <i>P</i> | <i>b</i> | 95% CI         |
|----------------------------|----------------|----------|----------|----------------|
| Intercept                  | 15.17          | < .001   | 4.86     | [4.23, 5.50]   |
| Drug                       | -2.15          | .034     | -0.42    | [-0.81, -0.03] |
| CS Period                  | 1.94           | .055     | 0.26     | [-0.01, 0.53]  |
| CS Type                    | 0.94           | .351     | 0.12     | [-0.14, 0.39]  |
| Drug * CS Period           | -19.29         | < .001   | -0.12    | [-0.14, -0.11] |
| Drug * CS Type             | -28.69         | < .001   | -0.19    | [-0.21, -0.18] |
| CS Period * CS Type        | -1.47          | .145     | -0.01    | [-0.02, 0.003] |
| Drug * CS Period * CS Type | -20.91         | < .001   | -0.13    | [-0.14, -0.11] |

Note: Categorical variables were effect coded with Vehicle/SCH23390 (Drug) as -1/+1, Pre-CS/CS (CS Period) as -1/+1, and Unpaired/Paired (CS Type) as -1/+1. Analysis included 128 data points. CS = conditioned stimulus.

**Table S4. Generalized linear mixed-effects model output for the combined overall and microstructural analyses of cue-potentiated feeding in Experiments 1 and 2 and the vehicle condition in Experiment 3.**

|                                     | <i>t</i> (df) | <i>P</i> | <i>b</i> | 95% CI         |
|-------------------------------------|---------------|----------|----------|----------------|
| <b>Total Licks (df = 308)</b>       |               |          |          |                |
| Intercept                           | 64.14         | < .001   | 5.47     | [5.30, 5.64]   |
| CS Period                           | 4.18          | < .001   | 0.20     | [0.11, 0.30]   |
| CS Type                             | -0.21         | .833     | -0.01    | [-0.09, 0.07]  |
| Concentration                       | 0.54          | .592     | 0.03     | [-0.09, 0.15]  |
| CS Period * CS Type                 | 29.01         | < .001   | 0.11     | [0.10, 0.11]   |
| CS Period * Concentration           | 15.81         | < .001   | 0.06     | [0.05, 0.07]   |
| CS Type * Concentration             | 3.69          | < .001   | 0.01     | [0.01, 0.02]   |
| CS Period * CS Type * Concentration | -4.55         | < .001   | -0.02    | [-0.02, -0.01] |
| <b>Total Bouts (df = 308)</b>       |               |          |          |                |
| Intercept                           | 23.84         | < .001   | 2.00     | [1.84, 2.17]   |
| CS Period                           | 7.09          | < .001   | 0.14     | [0.10, 0.18]   |
| CS Type                             | -0.30         | .761     | -0.01    | [-0.09, 0.06]  |
| Concentration                       | -5.72         | < .001   | -0.27    | [-0.36, -0.18] |
| CS Period * CS Type                 | 4.46          | < .001   | 0.09     | [0.05, 0.13]   |
| CS Period * Concentration           | 0.21          | .830     | 0.004    | [-0.04, 0.04]  |
| CS Type * Concentration             | -0.50         | .617     | -0.01    | [-0.05, 0.03]  |
| CS Period * CS Type * Concentration | -1.35         | .177     | -0.03    | [-0.07, 0.01]  |
| <b>Bout Duration (df = 277)</b>     |               |          |          |                |
| Intercept                           | 24.72         | < .001   | 1.83     | [1.68, 1.97]   |
| CS Period                           | 0.65          | .517     | 0.03     | [-0.06, 0.13]  |
| CS Type                             | 0.94          | .347     | 0.05     | [-0.05, 0.14]  |
| Concentration                       | 5.48          | < .001   | 0.42     | [0.27, 0.58]   |
| CS Period * CS Type                 | 0.06          | .953     | 0.003    | [-0.09, 0.10]  |
| CS Period * Concentration           | 0.59          | .557     | 0.03     | [-0.07, 0.13]  |
| CS Type * Concentration             | 1.24          | .214     | 0.06     | [-0.04, 0.16]  |
| CS Period * CS Type * Concentration | 0.14          | .890     | 0.01     | [-0.09, 0.10]  |

Note: Categorical variables were effect coded with 2%/20% (Concentration) as -1/+1, Pre-CS/CS (CS Period) as -1/+1, and Unpaired/Paired (CS Type) as -1/+1. CS = conditioned stimulus.
